# Supplementary material for: Cardioprotective mIGF-1/SIRT1 signaling induces hypertension, leukocytosis and fear response in mice
Source: PubMed Central journal article supplement (PMC3409677; doi:10.18632/aging.100464), 2012-06-11
Supplement: aging-04-402-s001.pdf [file aging-04-402-s001.pdf]

## SUPPLEMENTAL MATERIALS

**Supplemental Table 1. Reagents and Antibodies**

Primary antibodies:

| Protein targeted       | Host   | Clone | Provider  | Catalogue number |
|------------------------|--------|-------|-----------|------------------|
| SIRT1 (for IF studies) | rabbit |       | Abcam     | Ab12193          |
| MF-20                  | mouse  |       | DSHB-Iowa |                  |
| Vimentin               | mouse  | V9    | Sigma     | V6630            |
| CD144                  | rabbit |       | Abcam     | Ab33168          |
| SIRT1 (for ChIP-Seq)   | mouse  | 10E04 | Millipore | NG1693253        |

Secondary antibodies:

| Protein targeted           | Host   | Provider                 | Catalogue number |
|----------------------------|--------|--------------------------|------------------|
| HRP-conjugated anti-mouse  | Goat   | Amersham – GE Healthcare | NA9310V          |
| HRP-conjugated anti-rabbit | Goat   | Amersham – GE Healthcare | NA934V           |
| HRP conjugated anti-Goat   | Rabbit | Santa Cruz Biotechnology | sc-2020          |
| Alexa 488 conjugated       | Goat   | Invitrogen               | A-11008          |
| Alexa546 conjugated        | Goat   | Invitrogen               | A-11035          |

Other reagents:

| Name           | Provider                 | Catalogue number |
|----------------|--------------------------|------------------|
| ECL reagent    | Amersham – GE Healthcare | RPN2209          |
| Trizol Reagent | Invitrogen               | 15596            |
| SYBR®Green dye | Sigma                    | QR0100           |
| Tamoxifen      | Sigma                    | T5648            |
